# Supplementary material for: A paper sensor for unbound valproic acid detection in human serum
Source: Royal Society of Chemistry journal article supplement (doi:10.1039/d3nj02657d), 2023-01-01
Supplement: d3nj02657d1.pdf [file d3nj02657d1.pdf]

## *Supplementary Material*

# **Paper sensor for unbound valproic acid detecting in human serum**

## **Experimental section**

### **LC-MS/MS analysis**

According to the previous report<sup>1</sup>, VPA was analyzed by LC-MS/MS. The chromatographic conditions for the VPA detection were shown in Table S1. The multiple reaction monitoring (MRM) was used for MS/MS detection in negative electrospray ionization mode with the source temperature of 550 °C and the ion spray voltage of 5500 V. The MS/MS parameters were shown in Table S2. Other parameters were the curtain gas of 30 psi, ion source gas 1 and 2 of 50 psi. Finally, a series of VPA standards in methanol were prepared to establish a standard curve.

### **Sample preparation for LC-MS/MS**

The pretreatment of the human serum was based on the previously described report with slight modifications<sup>1</sup>. Briefly, the VPA standard (10 µL) was spiked in the human serum (40 µL) and then mixed with anhydrous methanol (150 µL) for 5 min. After centrifuging at 12000 rpm for 20 min, the supernatant (20 µL) was collected and dilute with MeOH/H<sub>2</sub>O (180 µL, 50/50, v/v). The solution was fully mixed and centrifuged at 12000 rpm for 10 min before the supernatant was collected for LC-MS/MS analysis.

**Table S1.** The chromatographic conditions of LC-MS/MS analysis for detecting VPA.

| Instrument conditions  |                                                                                                 |       |       |
|------------------------|-------------------------------------------------------------------------------------------------|-------|-------|
| Chromatographic column | C18 ethylene-bridged column (2.1 × 50 mm, 2.5 μm XBridge, Waters Corporation, Milford, MA, USA) |       |       |
| Column temperature     | 40°C                                                                                            |       |       |
| Injection volume       | 2 μL                                                                                            |       |       |
| Flow rate              | 0.3 mL/min                                                                                      |       |       |
| Mobile phase A         | Water containing 0.1% formic acid                                                               |       |       |
| Mobile phase B         | acetonitrile                                                                                    |       |       |
| Gradient elution       | time                                                                                            | A (%) | B (%) |
|                        | 0                                                                                               | 95    | 5     |
|                        | 1                                                                                               | 95    | 5     |
|                        | 5                                                                                               | 5     | 95    |
|                        | 7                                                                                               | 5     | 95    |
|                        | 7.1                                                                                             | 95    | 5     |
|                        | 10                                                                                              | 95    | 5     |

**Table S2.** The MS/MS parameters.

|     | Parents | Daughter | Declustering  | Collision  |
|-----|---------|----------|---------------|------------|
|     | (m/z)   | (m/z)    | Potential (V) | Energy (V) |
| VPA | 143     | 143      | -50           | -11        |

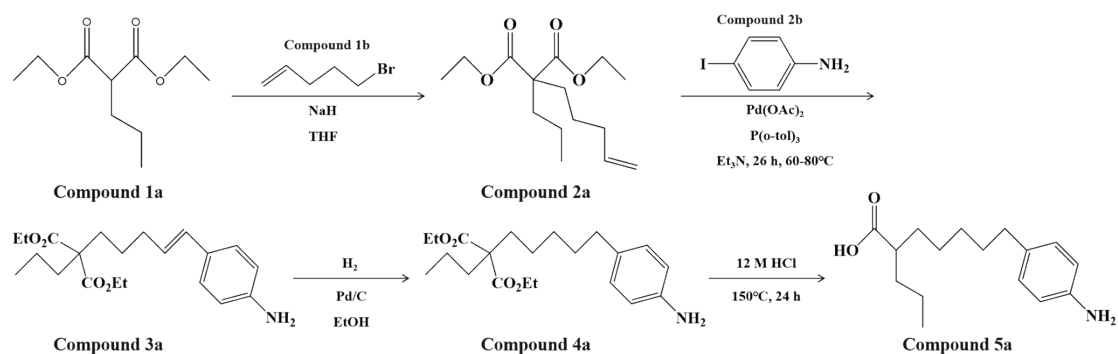

**Fig. S1** The derivation of VPA hapten.

**Fig. S2** (a) The LC-MS spectrum and (b)  $^1\text{H}$  NMR results of VPA hapten.

**Fig. S3** The calibration curve of VPA in methanol by LC-MS/MS.

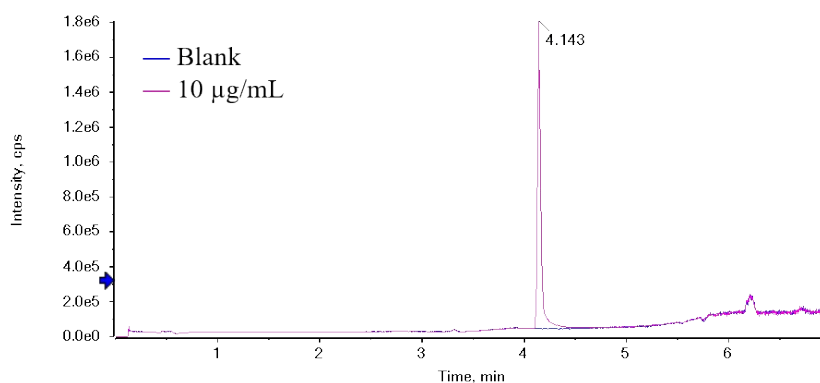

**Fig. S4** LC-MS/MS chromatograms of 0 and 10  $\mu\text{g/mL}$  VPA spiked in human serum.

## References

(1) Yang, X. P.; Jiang, Z. W.; Jiang, Y.; Ling, J.; Dong, L. L.; Zou, S. L.; Chen, R.; Hu, N. Determination of valproic acid and its six metabolites in human serum using LC-MS/MS and application to interaction with carbapenems in epileptic patients. *Biomed. Chromatogr.* **2023**, *37* (3), 12, Article. DOI: 10.1002/bmc.5572.
